# Supplementary material
Source: publisher figshare collection journal article supplement (https://frontiersin.figshare.com/ndownloader/files/16171109)
Supplement: Supplementary file [file 16171109]

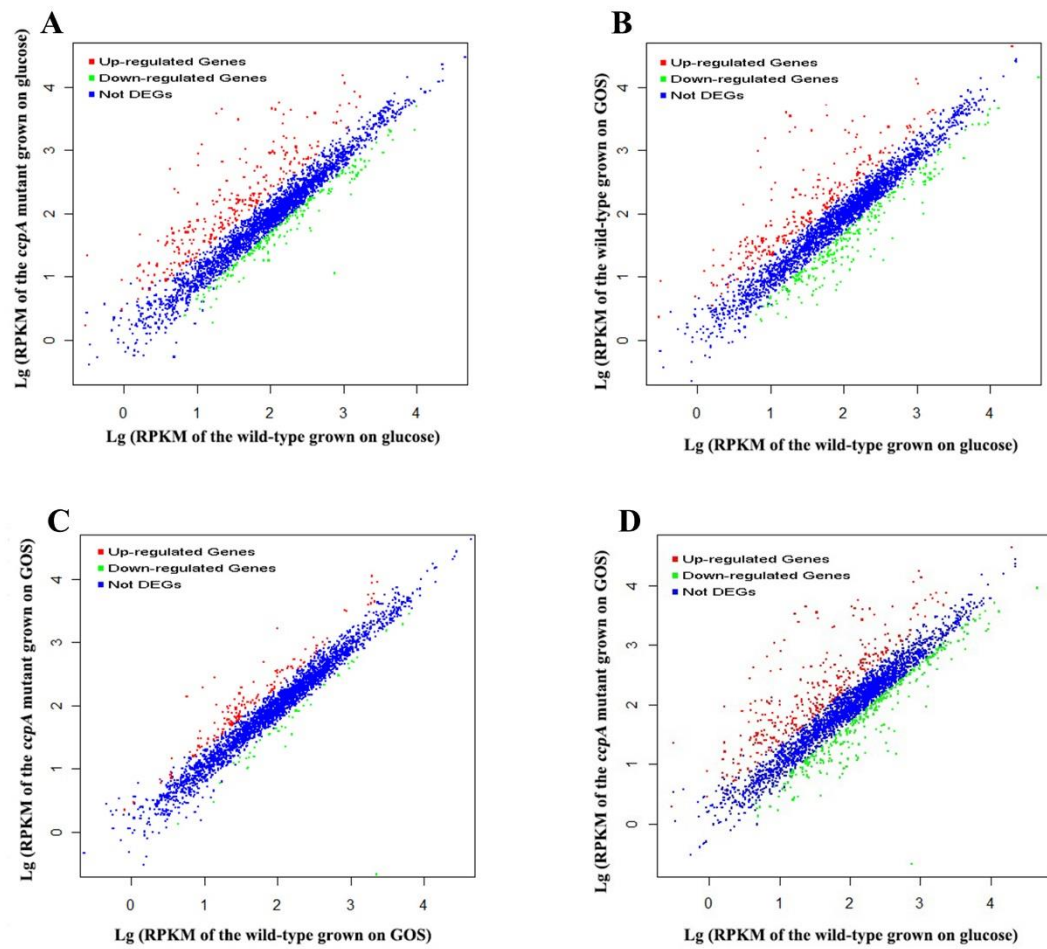

**Supplementary Figure 3.** Representative volcano plots of four pair-wise comparisons.
